# Supplementary material for: In Silico Prediction of Metabolic Reaction Catalyzed by Human Aldehyde Oxidase
Source: MDPI journal article supplement (doi:10.3390/metabo13030449), 2023-03-19
Supplement: s1 [file s1]

# **Supporting Information**

## **In Silico Prediction of Metabolic Reaction Catalyzed by Human Aldehyde Oxidase**

Mengting Huang, Keyun Zhu, Yimeng Wang, Chaofeng Lou, Huimin Sun, Weihua Li,

Yun Tang \* and Guixia Liu \*

Shanghai Frontiers Science Center of Optogenetic Techniques for Cell Metabolism,

Shanghai Key Laboratory of New Drug Design, School of Pharmacy,

East China University of Science and Technology, Shanghai 200237, China

\* Correspondence: ytang234@ecust.edu.cn (Y.T.); gxliu@ecust.edu.cn (G.L.);

Tel.: +86-21-6425-0811 (G.L.)

## **Table Legends**

**Table S1.** The substrates information collected from references

**Table S2.** The number of the substrate and the SOM associated with hAOX in the training set and external test set

**Table S3.** The parameters and value of feature selection methods

**Table S4.** Parameters of the machine learning methods

**Table S5.** The definition of atom features for the WLN model

**Table S6.** The definition of bond features for the WLN model

**Table S7.** Configuration for the WLN model

**Table S8.** Configuration for the Transformer model

**Table S9.** The predicted results of the transformer-baseline model on the test set

**Table S10.** The predicted results of the transformer-transfer learning model on the test set

## Figure Legends

**Figure S1.** Examples of hAOX -catalyzed reactions.

**Figure S2.** The performance of the best fingerprint-based model on training set, 10-fold and test set.

**Figure S3.** Some examples of results predicted by the three different models.

**Table S1.** The substrates information collected from references

| No. | Name                | Reference | React                                                                                  | Product                                                                                   |
|-----|---------------------|-----------|----------------------------------------------------------------------------------------|-------------------------------------------------------------------------------------------|
| 1   | RO1                 | [6]       | <chem>CC(CO)NC1=NC=C2C(N(CC(O)C)C(C(OC3=CC=C(F)C=C3F)=C2)=O)=N1</chem>                 | <chem>CC(NC1=NC(O)=C2C(N(C(C(OC3=CC=C(C=C3F)F)=C2)=O)CC(C)O)=N1)CO</chem>                 |
| 2   | SGX523              | [47]      | <chem>CN1N=CC(C(C=C2)=NN3C2=NN=C3SC4=CC=C(C=CC=N5)C5=C4)=C1</chem>                     | <chem>CN1N=CC(C(C=C2)=NN3C2=NN=C3SC4=CC=C5C=CC(O)=NC5=C4)=C1</chem>                       |
| 3   | RS-8359             | [48]      | <chem>CC1=C(C#N)C=CC(NC2=NC=NC3=C2CCC3O)=C1</chem>                                     | <chem>CC1=C(C=CC(NC2=NC(O)=NC3=C2CCC3O)=C1)C#N</chem>                                     |
| 4   | XK-469              | [48]      | <chem>CC(C(O)=O)OC1=CC=C(OC2=NC(C=C(Cl)C=C3)=C3N=C2)C=C1</chem>                        | <chem>CC(OC1=CC=C(C=C1)OC2=NC3=C(N=C2O)C=CC(Cl)=C3)C(O)=O</chem>                          |
| 5   | 2-Aminopurine       | [9]       | <chem>NC1=NC=C2C(NC=N2)=N1</chem>                                                      | <chem>NC1=NC=C2C(NC(O)=N2)=N1</chem>                                                      |
| 6   | 2-Hydroxypurine     | [49]      | <chem>O=C1N=CC2=C(NC=N2)N1</chem>                                                      | <chem>O=C1N=C(O)C2=C(N1)NC=N2</chem>                                                      |
| 7   | 2-Mercaptopurine    | [49]      | <chem>S=C1NC2=C(N=CN2)C=N1</chem>                                                      | <chem>S=C1NC2=C(C(O)=N1)N=CN2</chem>                                                      |
| 8   | 4-Hydroxypteridine  | [49]      | <chem>O=C1C2=C(N=CC=N2)NC=N1</chem>                                                    | <chem>O=C1C2=C(NC(O)=N1)N=CC=N2</chem>                                                    |
| 9   | 4-Methylacridine    | [49]      | <chem>CC1=CC=CC2=CC3=CC=CC=C3N=C21</chem>                                              | <chem>CC1=CC=CC2=C(O)C3=CC=CC=C3N=C21</chem>                                              |
| 10  | 6-Mercaptopurine    | [50]      | <chem>S=C1NC=NC2=C1N=CN2</chem>                                                        | <chem>S=C1NC=NC2=C1N=C(O)N2</chem>                                                        |
| 11  | 6-Methylpurine      | [51]      | <chem>CC1=C2C(NC=N2)=NC=N1</chem>                                                      | <chem>CC1=C2C(NC(O)=N2)=NC=N1</chem>                                                      |
| 12  | Adenine             | [49]      | <chem>NC1=NC=NC2=C1N=CN2</chem>                                                        | <chem>NC1=NC=NC2=C1N=C(O)N2</chem>                                                        |
| 13  | Carbazeran          | [52]      | <chem>COC1=CC(C(N2CCC(OC(NC)=O)CC2)=NN=C3)=C3C=C1OC</chem>                             | <chem>COC1=CC2=C(C=C1OC)C(O)=NN=C2N3CCC(CC3)OC(NC)=O</chem>                               |
| 14  | Cinnoline           | [53]      | <chem>C1(C=CC=C2)=C2N=NC=C1</chem>                                                     | <chem>OC1=CN=NC2=C1C=CC=C2</chem>                                                         |
| 15  | Hypoxanthine        | [9]       | <chem>O=C1NC=NC2=C1NC=N2</chem>                                                        | <chem>O=C1NC=NC2=C1NC(O)=N2</chem>                                                        |
| 16  | Methotrexate        | [54]      | <chem>NC1=C2C(N=CC(CN(C)C3=CC=C(C(NC(CCC(O)=O)C(O)=O)C=C3)=N2)=NC(N)=N1</chem>         | <chem>NC1=C2C(N=C(O)C(CN(C3=CC=C(C=C3)C(NC(C(O)=O)CCC(O)=O)C)=N2)=NC(N)=N1</chem>         |
| 17  | O-Benzoyloxyguanine | [52]      | <chem>NC1=NC(N=CN2)=C2C(OCC3=CC=C(C=C3)=N1</chem>                                      | <chem>NC1=NC2=C(C(OCC3=CC=CC=C3)=N1)NC(O)=N2</chem>                                       |
| 18  | Phthalazine         | [55]      | <chem>C12=CC=CC=C1C=NN=C2</chem>                                                       | <chem>OC1=NN=CC2=CC=CC=C21</chem>                                                         |
| 19  | Zebularine          | [56]      | <chem>O=C1N=CC=CN1C2OC(CO)C(O)C2O</chem>                                               | <chem>O=C1N=C(O)C=CN1C2OC(C(C2O)O)CO</chem>                                               |
| 20  | Zoniporide          | [48]      | <chem>O=C(NC(N)=N)C(C=N1)=C(C2CC2)N1C3=CC=CC4=C3C=CC=N4</chem>                         | <chem>O=C(C(C=NN1C2=CC=CC3=C2C=CC(O)=N3)=C1C4CC4)NC(N)=N</chem>                           |
| 21  | Compound 1          | [57]      | <chem>CC1=C(C(NC(N)=N)=O)C=NN1C2=C3C(NC=N3)=CC=C2</chem>                               | <chem>CC1=C(C=NN1C2=C3C(NC(O)=N3)=CC=C2)C(NC(N)=N)=O</chem>                               |
| 22  | Imatinib            | [58]      | <chem>CN(CC1)CCN1CC2=CC=C(C(NC3=C(C(NC4=NC(C5=CN=CC=C5)=CC=N4)=C(C)C=C3)=O)C=C2</chem> | <chem>CN1CCN(CC2=CC=C(C=C2)C(NC3=C(C(NC4=NC(C5=CN=C(O)C=C5)=CC=N4)=C(C=C3)C)=O)CC1</chem> |
| 23  | SB-277011           | [59]      | <chem>N#CC1=CC(CCN(CCC2CCC(NC(C3=CC=NC4=C3C=CC=C4)=O)CC2)C5)=</chem>                   | <chem>N#CC1=CC2=C(C=C1)CN(CCC3CCC(CC3)NC(C4=CC(O)=NC5=C4C=CC=C</chem>                     |

|    |                  |      | C5C=C1                                                                                  | 5)=O)CC2                                                                                   |
|----|------------------|------|-----------------------------------------------------------------------------------------|--------------------------------------------------------------------------------------------|
| 24 | Compound 2       | [60] | CN(N=C1)C=C1C2=CN=C(N=NN3C(C(C=C4)=CN5C4=NC=C5)C)C3=N2                                  | CN1N=CC(C2=C(O)N=C(C3=N2)N=N3C(C)C(C=C4)=CN5C4=NC=C5)=C1                                   |
| 25 | A-77-01          | [58] | CC1=CC=CC(C2=NNC=C2C3=CC=N4C=CC=CC=C43)=N1                                              | CC1=CC=CC(C2=NNC=C2C3=CC(O)=NC4=CC=CC=C43)=N1                                              |
| 26 | AMG-900          | [58] | NC1=NC=CC(C2=C(OC3=CC=C(NC4=NN=C(C5=CC(C)=CS5)C6=C4C=CC=C6)C=C3)N=CC=C2)=N1             | OC1=CC(C2=C(N=CC=C2)OC3=CC=C(C=C3)NC4=NN=C(C5=C4C=CC=C5)C6=CC(C)=CS6)=NC(N)=N1             |
| 27 | Bafetinib        | [58] | CC1=CC=C(NC(C2=CC=C(CN3CC[C@H](N(C)C)C3)C(C(F)(F)F)=C2)=O)C=C1NC4=NC=CC(C5=CN=CN=C5)=N4 | CC1=CC=C(C=C1NC2=NC=CC(C3=CN=C(O)N=C3)=N2)NC(C4=CC=C(C(C(F)(F)F)=C4)CN5CC[C@H](C5)N(C)C)=O |
| 28 | CL-387785        | [58] | BrC1=CC=CC(NC2=NC=NC3=CC=C(NC(C#CC)=O)C=C32)=C1                                         | BrC1=CC=CC(NC2=NC(O)=NC3=CC=C(C=C32)NC(C#CC)=O)=C1                                         |
| 29 | Lapatinib        | [58] | O=S(CCNCC1=CC=C(C2=CC3C(N=C(N=C3NC4=CC=C(C(C1)=C4)OCC5=C(C=CC(F)=C5)C=C2)O1)(C)=O       | O=S(CCNCC1=CC=C(C2=CC3C(N=C(O)N=C3NC4=CC=C(C(C1)=C4)OCC5=CC=CC(F)=C5)C=C2)O1)(C)=O         |
| 30 | Lapatinib-M1     | [58] | C1C1=CC(NC2=C3C(C=CC(C4=CC=C(CNCCS(=O)(C)=O)O4)=C3)=NC=N2)=CC=C1O                       | C1C1=CC(NC2=C3C(C=CC(C4=CC=C(CNCCS(=O)(C)=O)=C3)=NC(O)=N2)=CC=C1O                          |
| 31 | LDN-193189       | [58] | N1(C2=CC=C(C(C=N3)=CN4C3=C(C5=CC=NC6=CC=CC=C56)C=N4)C=C2)CCNCC1                         | OC1=NC2=CC=CC=C2C(C(C=N3)=C4N3C=C(C=N4)C(C=C5)=CC=C5N6CCNCC6)=C1                           |
| 32 | ML-347           | [58] | COC1=CC=C(C(C=N2)=CN3C2=C(C4=CC=NC5=C4C=CC=C5)C=N3)C=C1                                 | COC1=CC=C(C=C1)C(C=N2)=CN3C2=C(C=N3)C4=CC(O)=NC5=C4C=CC=C5                                 |
| 33 | SB-525334        | [58] | CC1=NC(C2=C(C3=CC(N=CC=N4)=C4C=C3)N=C(C(C)(C)C)N2)=CC=C1                                | CC1=NC(C2=C(N=C(N2)C(C)(C)C)C3=CC4=C(C=C3)N=C(O)C=N4)=CC=C1                                |
| 34 | Duvelisib        | [58] | C1C1=C2C(C=C([C@H](C)NC3=NC=NC4=C3N=CN4)N(C5=CC=CC=C5)C2=O)=CC=C1                       | C1C1=C2C(C=C(N(C2=O)C3=CC=CC=C3)[C@H](NC4=NC(O)=NC5=C4N=CN5)C)=CC=C1                       |
| 35 | Lu AF09535       | [61] | O=C(C1=CN=CC(C)=N1)N[C@]23C[C@@H](C[C@H]4C3)C[C@](C4)(NC(C5=CC=NC(C)=N5)=O)C2           | O=C(N[C@@]12C[C@H](C[C@](NC(C3=CC(O)=NC(C)=N3)=O)(C2)C4)C[C@H]4C1)C5=CN=CC(C)=N5           |
| 36 | O6-benzylguanine | [52] | NC1=NC2=C(N=CN2)C(COC3=CC=C(C=C3)=N1                                                    | NC1=NC2=C(N=C(O)N2)C(COC3=CC=CC=C3)=N1                                                     |
| 37 | LY3202626        | [62] | FC1=CN=C(N2CC(N=C(N)SC3)(C4=CC(NC(C5=NC=CN=C5)=O)=CC=C4F)C3C2)N=C1                      | FC1=CN=C(N=C1)N2CC3(C4=CC(NC(C5=NC=C(N=C5)O)=O)=CC=C4F)N=C(SCC3C2)N                        |
| 38 | VX-509           | [63] | O=C(NCC(F)(F)F)[C@](CC)(C)NC1=                                                          | O=C(NCC(F)(F)F)[C@](CC)(C)NC1=N                                                            |

|    |                           |      |                                                                                              |                                                                                                |
|----|---------------------------|------|----------------------------------------------------------------------------------------------|------------------------------------------------------------------------------------------------|
|    |                           |      | <chem>NC(C2=CNC3=C2C=CC=N3)=NC=C1</chem>                                                     | <chem>C(C2=C(O)NC3=C2C=CC=N3)=NC=C1</chem>                                                     |
| 39 | VU0424238                 | [64] | <chem>CC1=CC(OC2=CN=CN=C2)=CC(C(NC3=CC=C(F)C=N3)=O)=N1</chem>                                | <chem>CC1=CC(OC2=CN=CN=C2O)=CC(C(NC3=CC=C(F)C=N3)=O)=N1</chem>                                 |
| 40 | VU0424238-M1              | [64] | <chem>CC1=CC(OC2=CN=CN=C2O)=CC(C(NC3=CC=C(F)C=N3)=O)=N1</chem>                               | <chem>CC1=CC(OC2=CN=C(O)N=C2O)=CC(C(NC3=CC=C(F)C=N3)=O)=N1</chem>                              |
| 41 | PF-05190457               | [65] | <chem>CC1=CN2C=C(CC(=O)N3CCC4(CN(C4)[C@@H]4CCCC5=C4C=CC(=C5)C4=CC(C)=NC=N4)CC3)N=C2S1</chem> | <chem>CC1=CN2C=C(N=C2S1)CC(N3CCC4(CN(C4)[C@@H]5CCCC6=C5C=CC(C7=CC(C)=NC(O)=N7)=C6)C4)=O</chem> |
| 42 | Cryptolepine              | [66] | <chem>C[N+]=C2C(C=CC=C2)=CC3=C1C(C=CC=C4)=C4N3</chem>                                        | <chem>C[N+]=C2C(C=CC=C2)=C(O)C3=C1C(C=CC=C4)=C4N3</chem>                                       |
| 43 | N1-methylnicotinamide     | [67] | <chem>NC(C1=CC=C[N+](C)=C1)=O</chem>                                                         | <chem>NC(C1=C(O)C=C[N+](C)=C1)=O</chem>                                                        |
| 44 | 2-Methylquinazoline       | [68] | <chem>Cc1nc(c2cn1)cccc2</chem>                                                               | <chem>Cc1nc(O)c2cccc2n1</chem>                                                                 |
| 45 | Quinazoline_Beedha_m_Q6   | [68] | <chem>C(/c1cnccc1)=C/c2nc(c3cn2)cccc3</chem>                                                 | <chem>Oc1nc(/C=C/c2ccccc2)nc3cccc31</chem>                                                     |
| 46 | Quinazoline_Beedha_m_Q7   | [68] | <chem>c1cc[n+](Cc2nc(c3cn2)cccc3)cc1</chem>                                                  | <chem>Oc1nc(C[n+]2cccc2)nc3cccc31</chem>                                                       |
| 47 | Quinazoline_Beedha_m_Q8   | [68] | <chem>OCC(c1c(c2nnc1)cccc2)CO</chem>                                                         | <chem>OCC(CO)c1nc(O)nc2cccc12</chem>                                                           |
| 48 | Quinazoline_Beedha_m_Q9   | [68] | <chem>c1cc(c2cc1)ncnc2N3CCCCC3</chem>                                                        | <chem>Oc1nc(N2CCCCC2)c3cccc3n1</chem>                                                          |
| 49 | Quinazoline_Beedha_m_Q10  | [68] | <chem>O=S1(N(CCC2CCN(c3c(c4nnc3)cccc4)CC2)CCCC1)=O</chem>                                    | <chem>O=S1(N(CCCC1)CCC2CCN(CC2)c3nc(O)nc4cccc34)=O</chem>                                      |
| 50 | Quinazoline_Beedha_m_Q11  | [68] | <chem>COc1cc(c2cc1)c(N3CCC(CCN4S(=O)(=O)CCCC4)CC3)ncn2</chem>                                | <chem>COc1ccc2nc(O)nc(N3CCC(CC3)CCN4S(=O)(=O)CCCC4)=O)c2c1</chem>                              |
| 51 | Quinazoline_Beedha_m_Q14  | [68] | <chem>CCNOCOC1CCN(c2c(c3nnc2)cccc3)C1</chem>                                                 | <chem>CCNOCOC1CCN(CC1)c2nc(O)nc3cccc23</chem>                                                  |
| 52 | Quinazoline_Beedha_m_Q13  | [68] | <chem>COc1c(OC)cc(c2c1)c(N3CCC(CCN4S(=O)(=O)CCCC4)CC3)ncn2</chem>                            | <chem>COc1cc2nc(O)nc(N3CCC(CC3)CCN4S(=O)(=O)CCCC4)=O)c2cc1OC</chem>                            |
| 53 | 1-Cl-67-DiMeO-phthalazine | [68] | <chem>Oc1c(O)cc(c2c1)c(Cl)nnc2</chem>                                                        | <chem>Oc1cc2c(O)nnc(Cl)c2cc1O</chem>                                                           |

**Table S2.** The number of the substrate and the SOM associated with hAOX in the training set and external test set

|              | Substrate | SOM | Non-SOM |
|--------------|-----------|-----|---------|
| Training set | 198       | 322 | 315     |
| Test set     | 53        | 56  | 112     |

**Table S3.** The parameters and value of feature selection methods

| Feature selection method           | Parameters                                        |
|------------------------------------|---------------------------------------------------|
| Variance Threshold (VT)            | Threshold = 0                                     |
| Select percentile of Feature (SPF) | Percentile = 5,10,15, 20, 25, ..., 95             |
| Principal Component Analysis (PCA) | n_components = range (1, min(x_sample,x_feature)) |

**Table S4.** Parameters of the machine learning methods

| Machine learning method | Parameters                                                                                                                                                                                 |
|-------------------------|--------------------------------------------------------------------------------------------------------------------------------------------------------------------------------------------|
| GDBT                    | "n_estimators": range (10, 101, 10), "learning_rate":np.arange(1, 21,1)*0.1                                                                                                                |
| SVM                     | 'kernel': ['rbf'], 'gamma': np.logspace(-15, 3, 10, base=2), 'C': np.logspace(-5, 9, 8, base=2), 'class_weight': ['balanced']                                                              |
| RF                      | "min_samples_split": range (3, 5),"min_samples_leaf": range (3, 5),"n_estimators": range (10, 121, 10),"criterion": ["gini", "entropy"],"class_weight": ["balanced_subsample", "balanced"] |

**Table S5.** The definition of atom features for the WLN model

| Atom feature | Description                                                                                                                                                                                                                                                                                                                                                                                                             |
|--------------|-------------------------------------------------------------------------------------------------------------------------------------------------------------------------------------------------------------------------------------------------------------------------------------------------------------------------------------------------------------------------------------------------------------------------|
| Atom type    | One hot vector specifying the type of this atom: ['C', 'N', 'O', 'S', 'F', 'Si', 'P', 'Cl', 'Br', 'Mg', 'Na', 'Ca', 'Fe','As', 'Al', 'I', 'B', 'V', 'K', 'Ti', 'Yb', 'Sb', 'Sn', 'Ag', 'Pd', 'Co', 'Se', 'Ti', 'Zn', 'H', 'Li', 'Ge', 'Cu', 'Au', 'Ni', 'Cd', 'In', 'Mn', 'Zr', 'Cr', 'Pt', 'Hg', 'Pb', 'W', 'Ru', 'Nb', 'Re', 'Te', 'Rh', 'Tc', 'Ba', 'Bi', 'Hf', 'Mo', 'U', 'Sm', 'Os', 'Ir', 'Ce', 'Gd', 'Ga', 'Cs'] |
| Charge       | Electrostatic charge of this atom: [-3, -2, -1, 0, 1, 2]                                                                                                                                                                                                                                                                                                                                                                |
| Degree       | The degree of the atom: range (5)                                                                                                                                                                                                                                                                                                                                                                                       |

**Table S6.** The definition of bond features for the WLN model

| Bond feature | Description                                        |
|--------------|----------------------------------------------------|
| Bond type    | One hot vector of Single, Double, Triple, Aromatic |
| Conjugated   | whether the bond is conjugated                     |
| In rings     | whether the bond is in a ring of any size          |

**Table S7.** Configuration for the WLN model

| Parameters  | Value |
|-------------|-------|
| Batch size  | 20    |
| Hidden size | 300   |
| max_norm    | 5.0   |

|                    |       |
|--------------------|-------|
| node_in_feats      | 82    |
| edge_in_feat       | 6     |
| node_pair_in_feats | 10    |
| n_layers           | 3     |
| Learning rate      | 0.001 |

**Table S8.** Configuration for the Transformer model

| Parameters      | Value  |
|-----------------|--------|
| rnn_size        | 400    |
| layers          | 6      |
| transformer_ff  | 512    |
| heads           | 8      |
| Optim           | adam   |
| adam_beta1      | 0.9    |
| adam_beta2      | 0.998  |
| decay_method    | noam   |
| learning_rate   | 2.0    |
| batch_size      | 500    |
| batch_type      | tokens |
| dropout         | 0.1    |
| label_smoothing | 0.1    |

**Table S9.** The predicted results of the transformer-baseline model on the test set

|          |                                      |          |          |
|----------|--------------------------------------|----------|----------|
| Reactant | <chem>C1=CC=C2C=NN=CC2=C1</chem>     |          |          |
| Product  | <chem>OC1=NN=CC2=CC=CC=C21</chem>    |          |          |
| Top-k    | Predicted SMILES                     | Validity | Accurate |
| Top-1    | <chem>CC1=CC=C2N=CN=C(O)C2=C1</chem> | Valid    | Wrong    |
| Top-2    | <chem>CC1=CC=C2N=C(O)N=CC2=C1</chem> | Valid    | Wrong    |
| Top-3    | <chem>OC1=CC=C2C=CC=CC2=N1</chem>    | Valid    | Wrong    |
| Top-4    | <chem>CC1=CC=C2N=CO)N=CC2=C1</chem>  | Invalid  | Wrong    |
| Top-5    | <chem>CC1=CC=C2N=CN=C(O)C2=</chem>   | Invalid  | Wrong    |

**Table S10.** The predicted results of the transformer-transfer learning model on the test set

|          |                                   |          |          |
|----------|-----------------------------------|----------|----------|
| Reactant | <chem>C1=CC=C2C=NN=CC2=C1</chem>  |          |          |
| Product  | <chem>OC1=NN=CC2=CC=CC=C21</chem> |          |          |
| Top-k    | Predicted SMILES                  | Validity | Accurate |
| Top-1    | <chem>OC1=C2C=CC=CC2=CN=N1</chem> | Valid    | Right    |
| Top-2    | <chem>OC1=NN=CC2=C1C=CC=C2</chem> | Valid    | Right    |



|       |                                      |       |       |
|-------|--------------------------------------|-------|-------|
| Top-3 | <chem>OC1=NN=CC2=CC=CC=C21</chem>    | Valid | Right |
| Top-4 | <chem>OC1=NN=CC2=CC=CC=C12</chem>    | Valid | Wrong |
| Top-5 | <chem>OC1=C2C=CC=CC2=C(O)N=N1</chem> | Valid | Wrong |

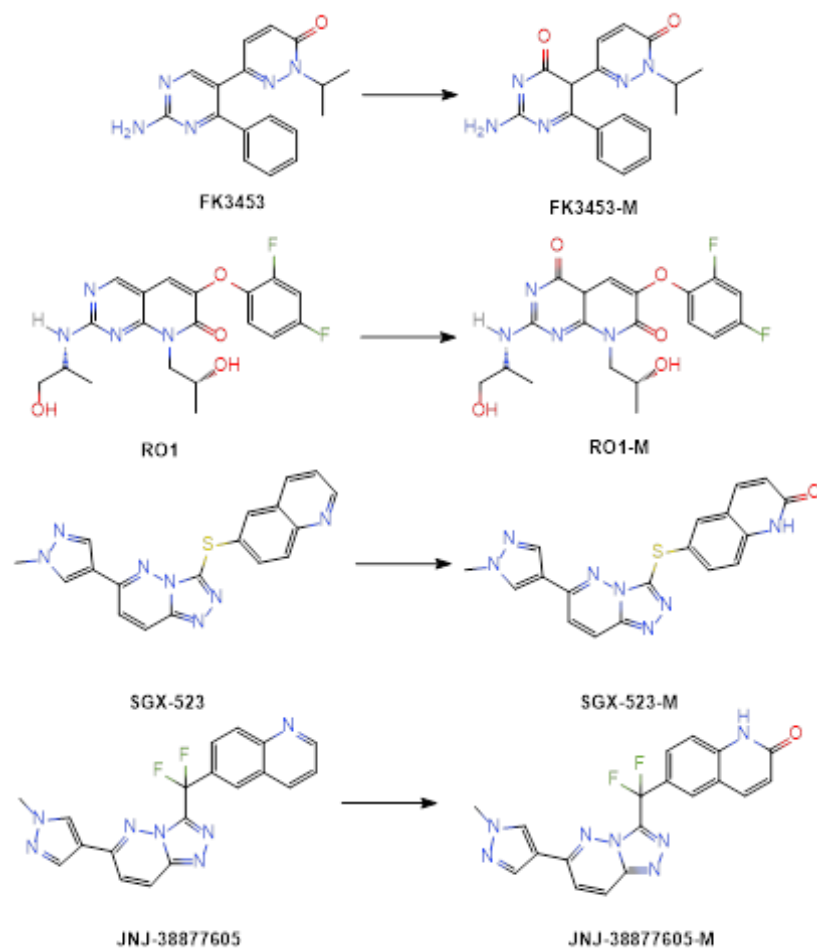

**Figure S1.** Examples of hAOX -catalyzed reactions.

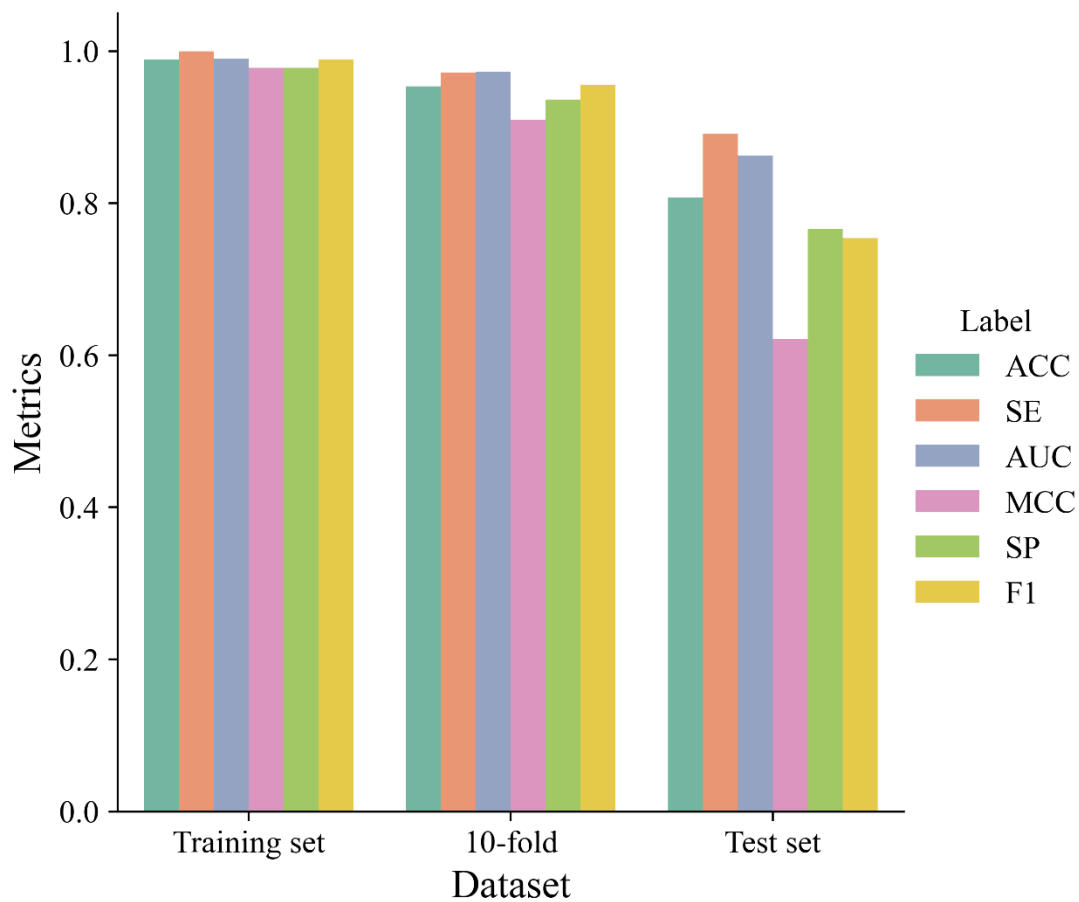

**Figure S2.** The performance of the best fingerprint-based model on training set, 10-fold and test set.

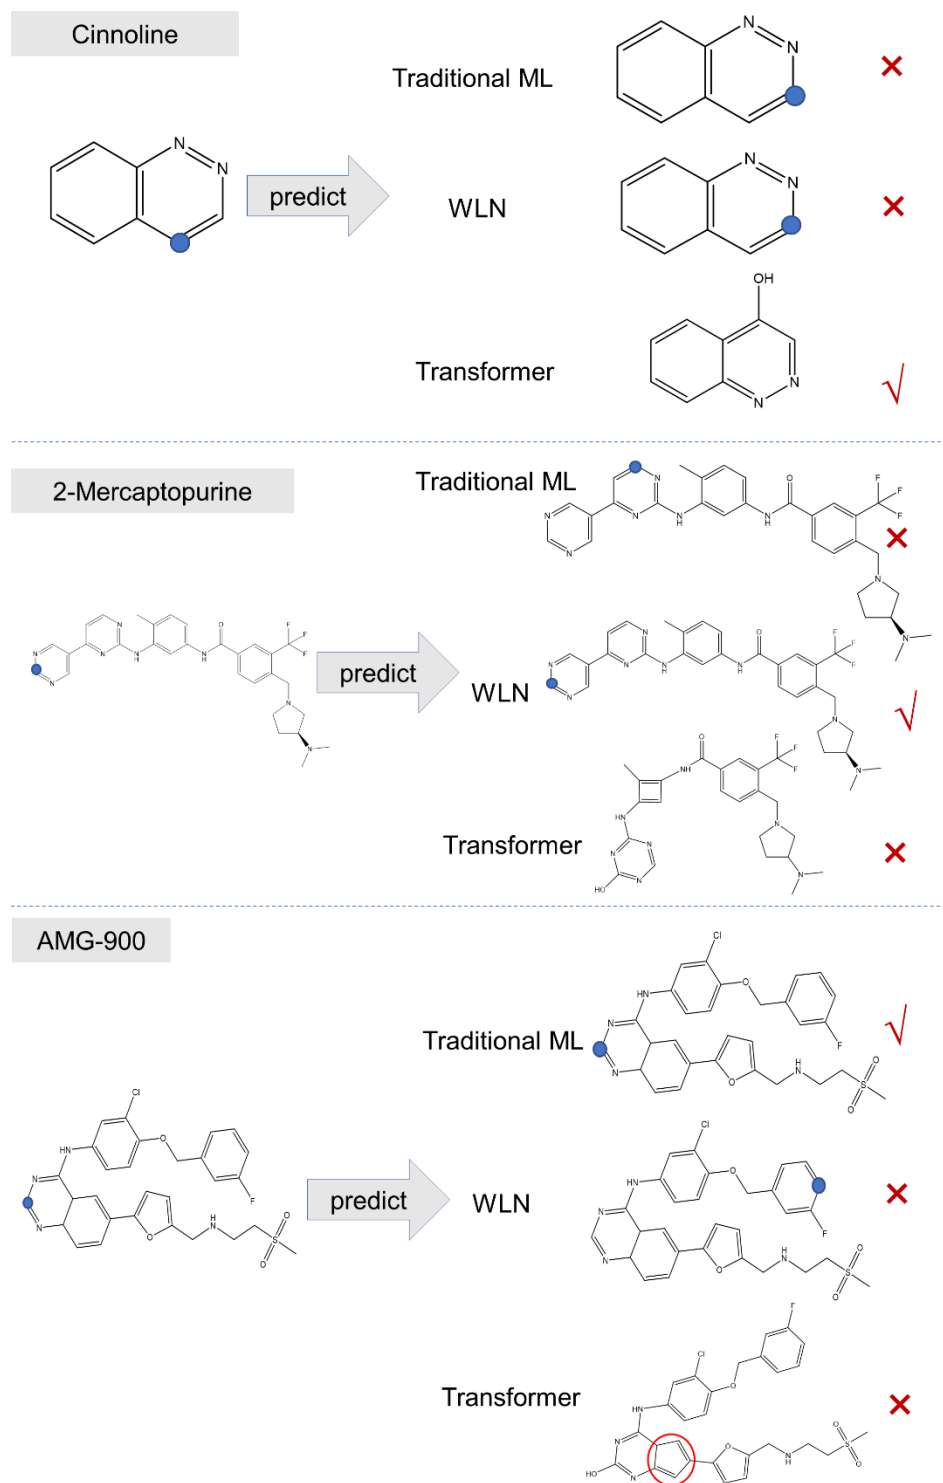

**Figure S3.** Some examples of results predicted by the three different model.
